# Supplementary material for: Carbon dot–Au(i)Ag(0) assembly for the construction of an artificial light harvesting system
Source: Royal Society of Chemistry journal article supplement (doi:10.1039/c8dt00230d), 2018-01-01
Supplement: c8dt00230d1.pdf [file c8dt00230d1.pdf]

### Electronic Supplementary Information

## Carbon dot-Au(I)Ag(0) assembly for construction of artificial light harvesting system

Jayasmita Jana,<sup>a</sup> Teresa Aditya,<sup>a</sup> Tarasankar Pal<sup>\*a</sup>

<sup>a</sup>Department of Chemistry, Indian Institute of Technology, Kharagpur-721302, India

\*Corresponding author. Phone: +91-03222 283320. E-mail: [tpal@chem.iitkgp.ernet.in](mailto:tpal@chem.iitkgp.ernet.in)

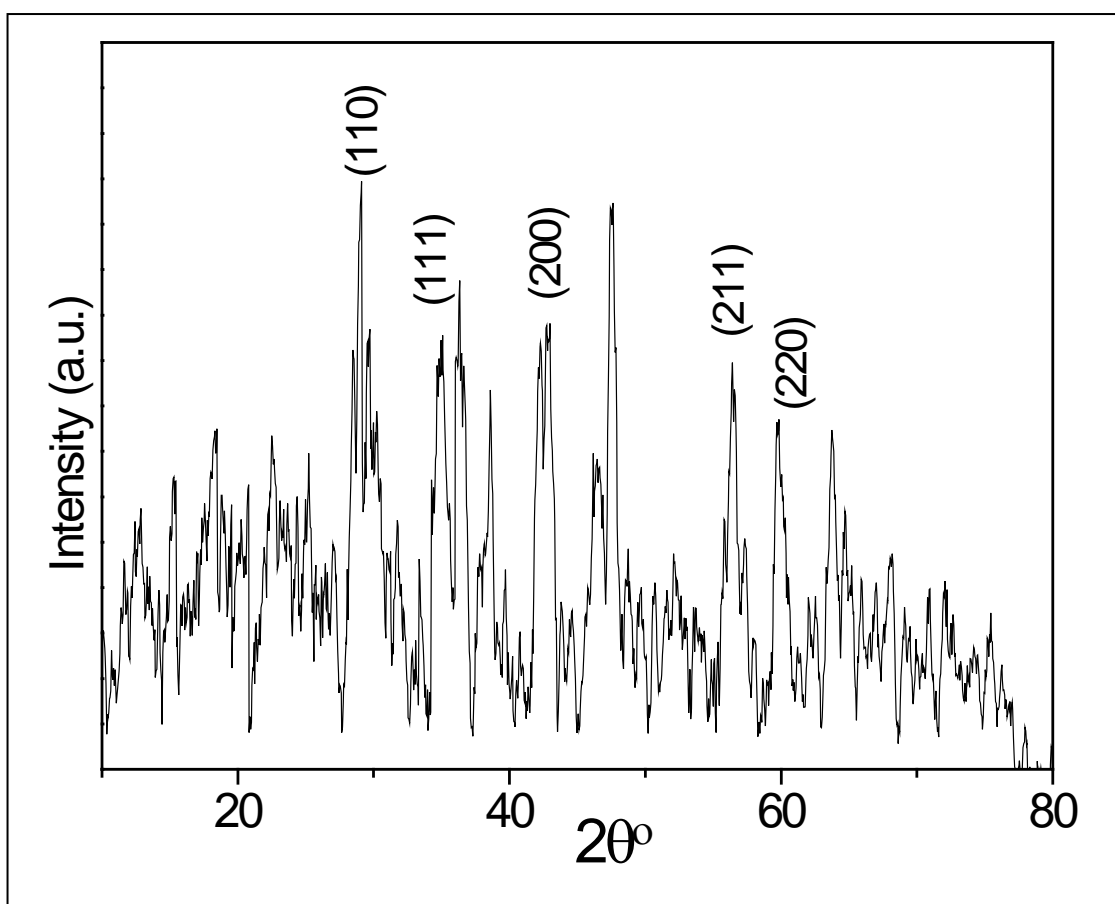

Figure S1: XRD pattern of the brown residue. XRD data suggests that the precipitate contains  $\text{Cu}_2\text{O}$ .

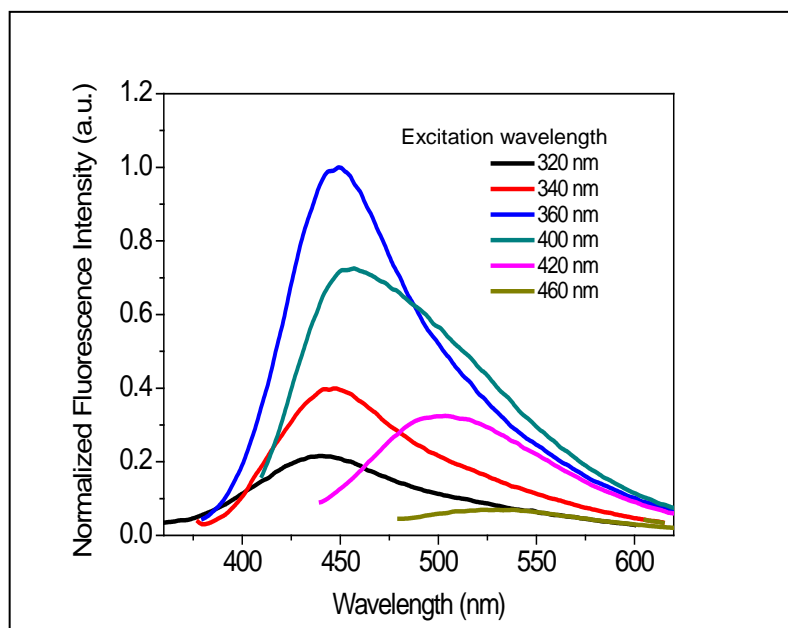

Figure S2: Fluorescence spectral profile of GCD at different excitation wavelength.

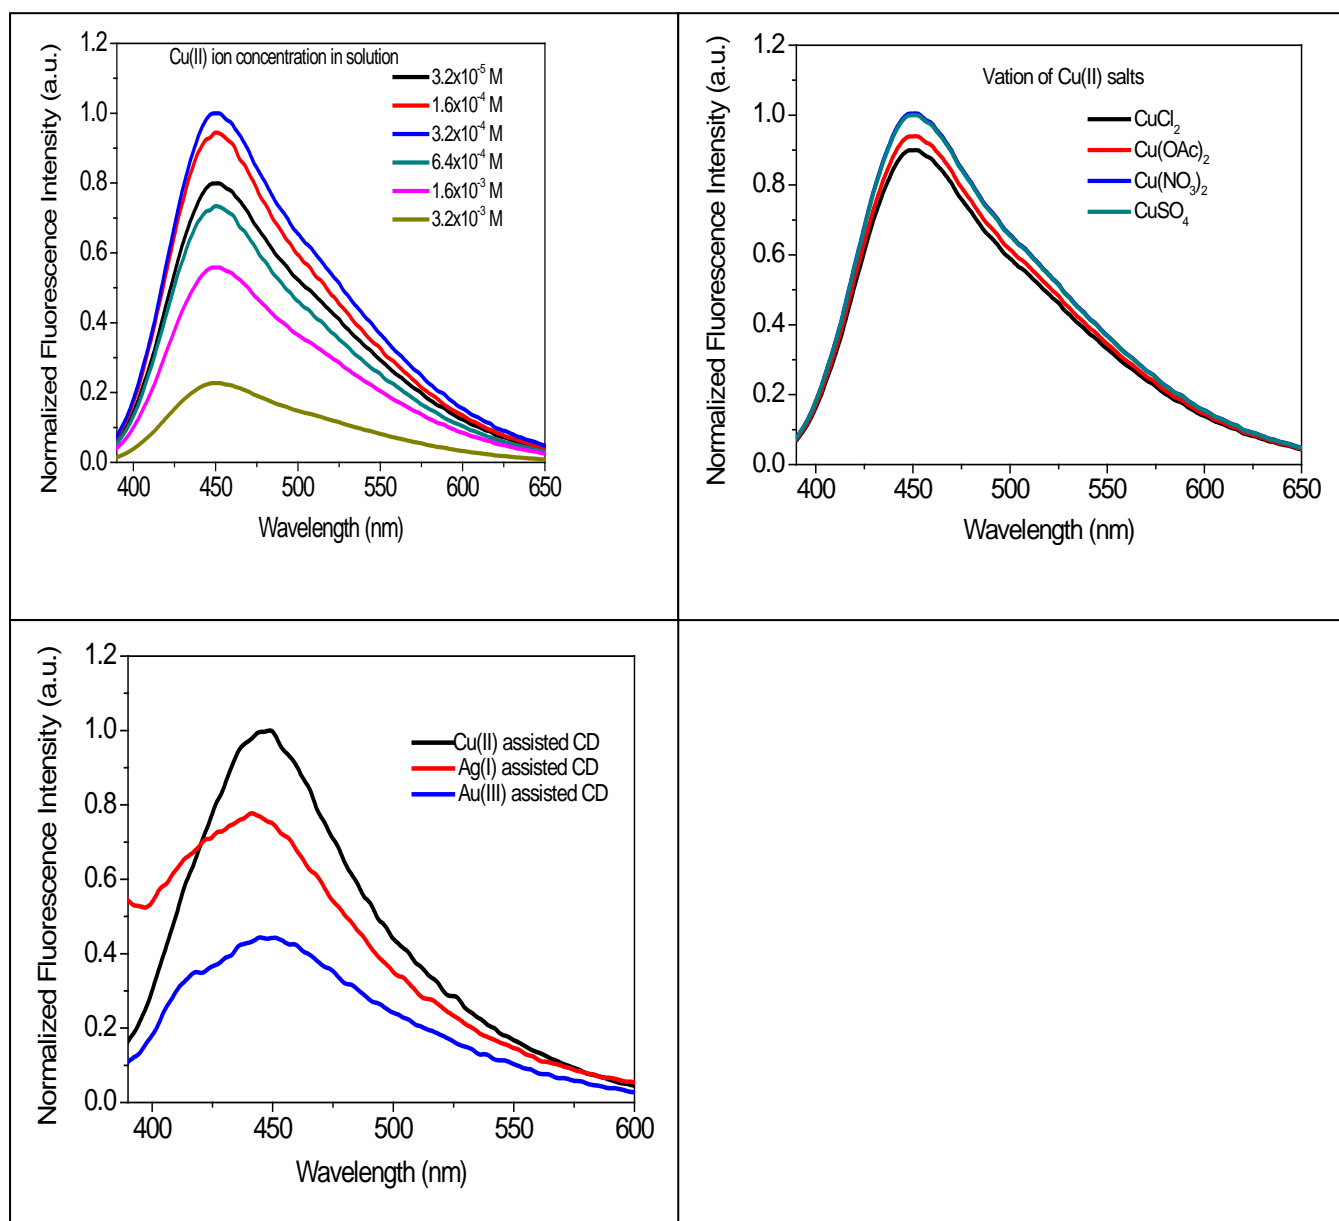

Figure S3: (A) Fluorescence spectral profile of products from MHT out of glucose and  $\text{CuSO}_4 \cdot 5\text{H}_2\text{O}$  reaction mixture -with different concentrations of Cu(II).  $\lambda_{\text{ex}}=360$  nm. (B) Fluorescence spectral profile of products from MHT out of glucose and different Cu(II) salts mixtures.  $\lambda_{\text{ex}}=360$  nm. (C) Fluorescence spectral profile of products from MHT out of glucose and Cu(II), Ag(I) and Au(III) salts.  $\lambda_{\text{ex}}=360$  nm

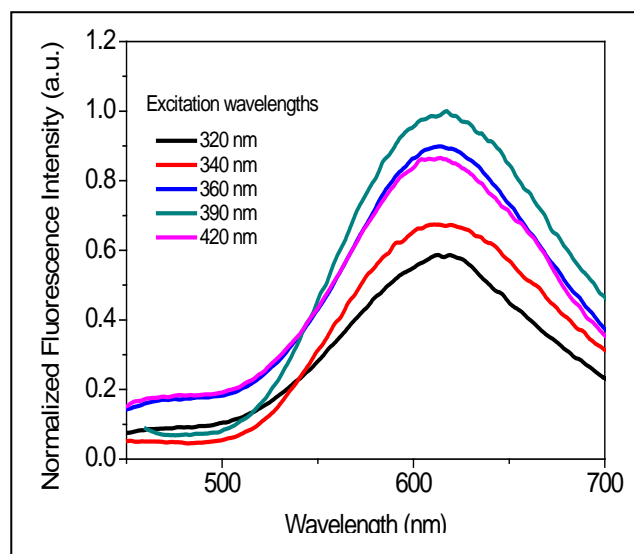

Figure S4: Fluorescence spectral profile of AuAgFA at different excitation wavelengths keeping the emission maximum fixed at 620 nm.

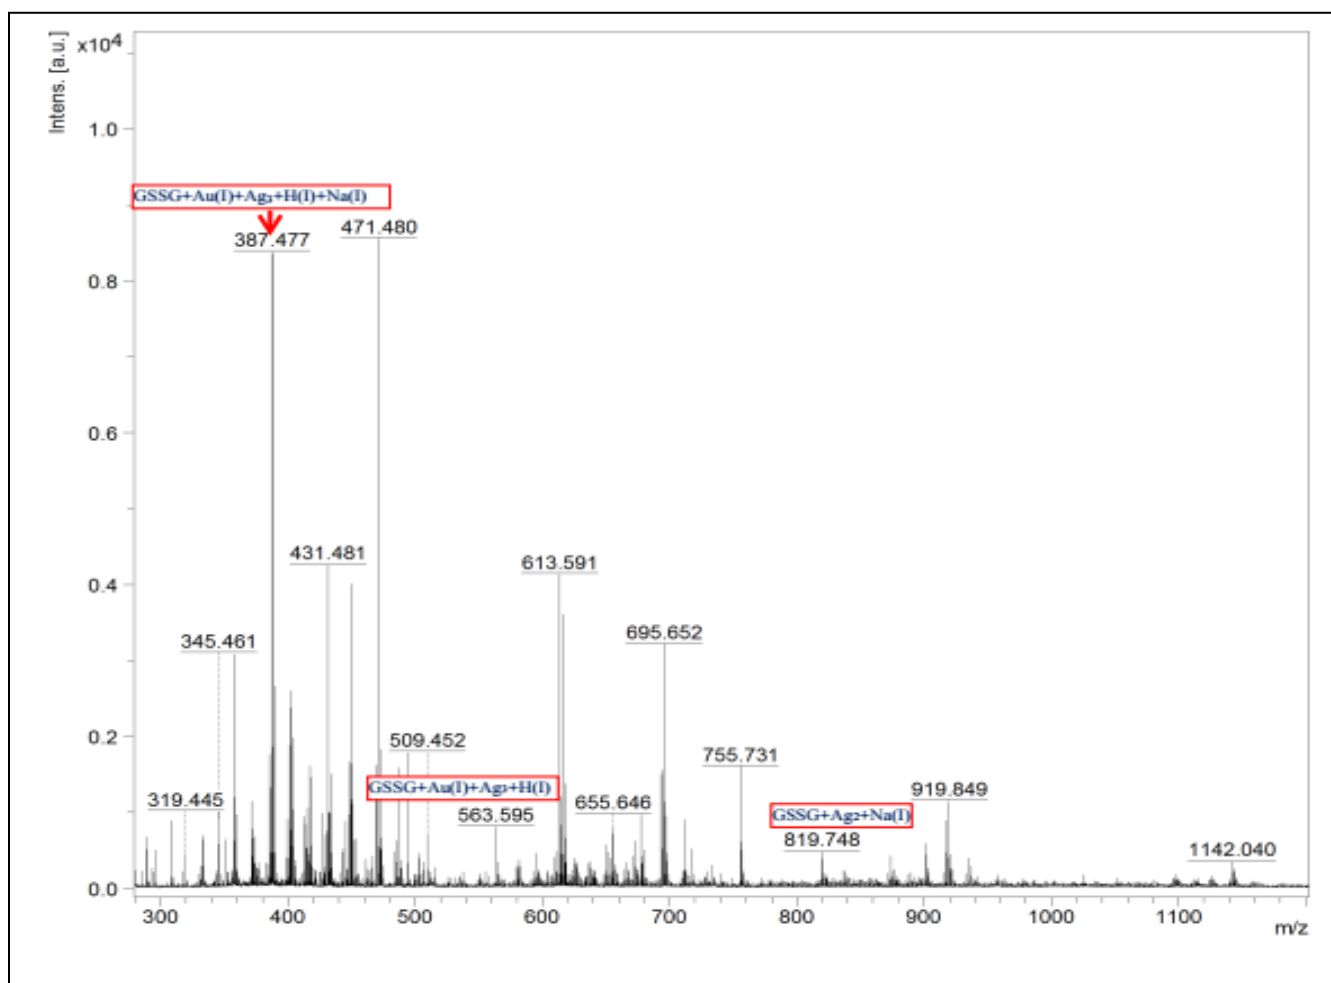

Figure S5: MALDI-Mass spectrum of AuAgFA.

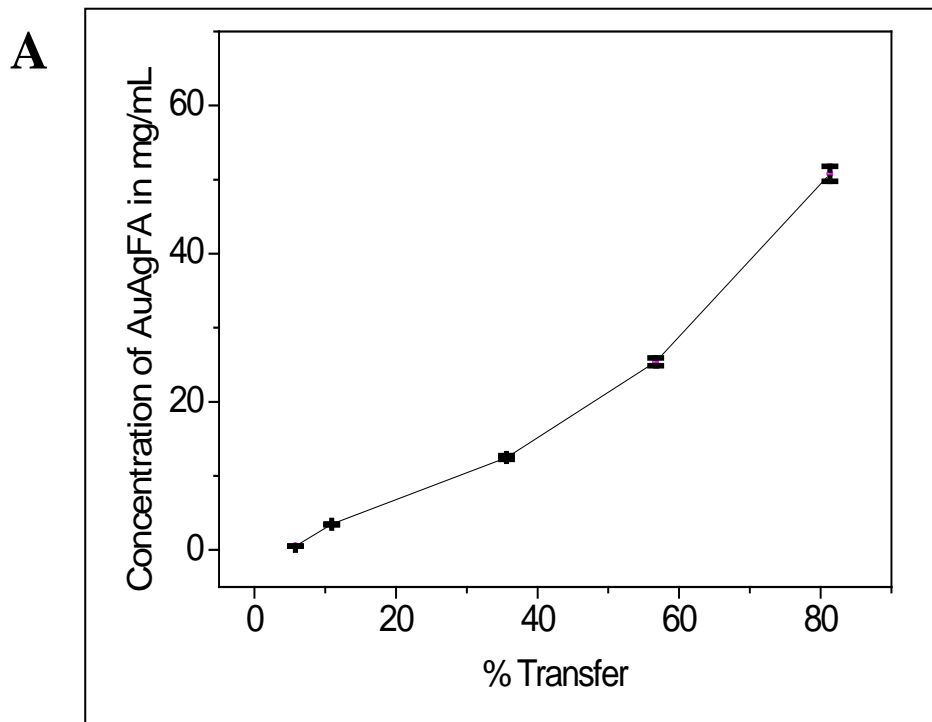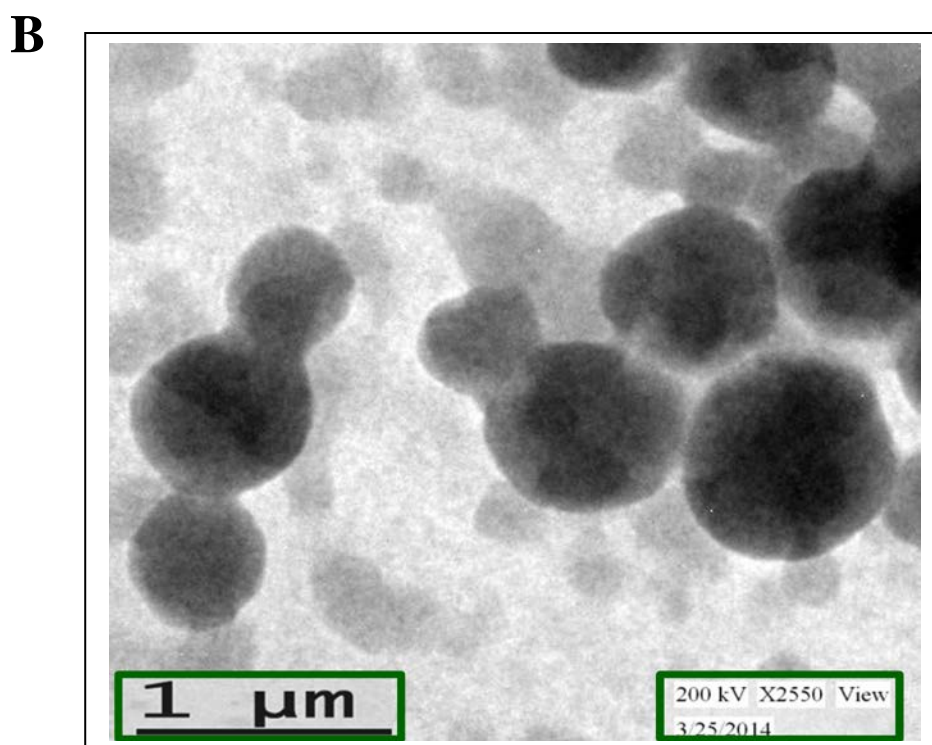

Figure S6: (A) The change in energy transfer efficiency in the presence of different concentrations of AuAgFA (B) TEM image of GCD-AuAgFA system on a 1:1 concentration ration.

Table S1: An account of fluorescence lifetime of GCD, AuAgFA and GAD-AuAgFA (N). N denotes different concentrations of AuAgFA.

N=1: 0.52 mg/mL of AuAgFA

N=2: 3.45 mg/mL of AuAgFA

N=3: 10.5 mg/mL of AuAgFA

N=4: 25.4 mg/mL of AuAgFA

N=5: 50.8 mg/mL of AuAgFA

| Compound       | $\tau_1$ (ns) | $\tau_2$ (ns) | $\tau_3$ (ns) | $\alpha_1$ | $\alpha_2$ | $\alpha_3$ | $\chi^2$ | $\tau_{avg}$ (ns)<br>[upto<br>two<br>decimal] |
|----------------|---------------|---------------|---------------|------------|------------|------------|----------|-----------------------------------------------|
| GCD            | 8.01          | 17.61         | -             | 94.68      | 5.32       | -          | 0.87     | 8.51                                          |
| GCD-AuAgFA (1) | 8.01          | 8.018         | 8.018         | 94.4       | 2.7        | 2.9        | 0.89     | 8.01                                          |
| GCD-AuAgFA (2) | 8.01          | 0.8           | 0.8           | 94.27      | 3.12       | 2.16       | 1.1      | 7.58                                          |
| GCD-AuAgFA (3) | 8.01          | 0.801         | 0.82          | 65.02      | 16.27      | 18.71      | 0.89     | 5.48                                          |
| GCD-AuAgFA (4) | 8.01          | 0.801         | 0.82          | 40.19      | 21.11      | 38.7       | 0.89     | 3.69                                          |
| GCD-AuAgFA (5) | 8.01          | 0.801         | 0.82          | 10.99      | 10.52      | 78.49      | 0.89     | 1.59                                          |
| AuAgFA         | 6.045         | 6.045         | -             | 45.64      | 54.35      | -          | 1.102    | 6.045                                         |

Table S2: An account of energy transfer efficiency of different donor-acceptor systems.

| System                                                                                                                                                                                                                                                | Energy transfer efficiency | Ref.         |
|-------------------------------------------------------------------------------------------------------------------------------------------------------------------------------------------------------------------------------------------------------|----------------------------|--------------|
| A sulfato- $\beta$ -cyclodextrin/oligo(phenylenevinylene) derivative/nile red system                                                                                                                                                                  | 72%                        | Ref. 1       |
| The energy transfer occurs from the 28 photoexcited zinc porphyrin units to the focal free-base porphyrin unit occurs in a large, star-shaped dendritic multiporphyrin array in which the chromophore units are linked through flexible ether groups. | 71%                        | Ref. 2       |
| Carbon dot- BSA-protein-capped goldnanocluster system<br>Carbon dots- coumarin encapsulated BSA-protein-capped gold nanocluster system                                                                                                                | 63%<br>83%                 | Ref.3        |
| BODIPY based molecules: energy acceptors.<br>Single poly(aryl ether) dendron amphiphile nanorods: antenna chromophore.                                                                                                                                | 72%                        | Ref. 4       |
| Cationic xanthene derivative: Donor<br>Cationic porphyrin: Acceptor                                                                                                                                                                                   | 80%                        | Ref. 5       |
| <b>Carbon dot: donor</b><br><b>GSH-AuAg assembly: acceptor</b>                                                                                                                                                                                        | 81.3%                      | Present work |

#### References:

1. J.-J.Li, Y. Chen, J. Yu, N. Cheng, Y. Liu, *Adv. Mater.* 2017, **29**, 1701905(1-5).
2. M.-S. Choi, T. Aida, T. Yamazaki, I. Yamazaki, *Angewandte Chemie*, 2001, **113**, 3294-3298.
3. M.K. Barman, B. Paramanik, D. Bain, A. Patra, *Chem. Eur. J.* 2016, **22**, 11699 – 11705
4. A.Maity, A. Dey, M. Gangopadhyay, A. Das, *Nanoscale*, 2018, **DOI: 10.1039/C7NR07663K**.
5. Y.Ohtani, T. Shimada, S.Takag, *J. Phys. Chem. C* 2015, **119**, 18896–18902.
